# Supplementary material for: Return to sport after open and microdiscectomy surgery versus conservative treatment for lumbar disc herniation: a systematic review with meta-analysis
Source: HighWire-hosted journal article supplement (doi:10.1136/bjsports-2015-094691), 2015-10-21
Supplement: bjsports-2015-094691supp.pdf [file bjsports-2015-094691supp.pdf]

Appendix 1: Detailed search strategy for the MEDLINE database

("surgery" OR "postoperative") AND ("Return-to-play" OR "return-to-sport" OR "return to play" OR "return to sport" OR "return to" OR "reentry") AND ("Back Injuries" OR "lumbar" OR "Lumbosacral Region" OR "low back" OR "lower back" OR "lower vertebrae" OR "low spine" OR "lumbar spine" OR "erector spinalis" OR "multifidus" OR "L1" OR "L2" OR "L3" OR "L4" OR "L5") AND ("sport" OR "athlete" OR "athletic")
