# Supplementary material for: Return to sport after open and microdiscectomy surgery versus conservative treatment for lumbar disc herniation: a systematic review with meta-analysis
Source: HighWire-hosted journal article supplement (doi:10.1136/bjsports-2015-094691), 2015-10-21
Supplement: bjsports-2015-094691supp_table1.pdf [file bjsports-2015-094691supp_table1.pdf]

**Supplementary Table 1 – Demographics of Included Studies**

| Eligible Studies            | Source of Information Describing Athletes Return to Play                                                                              | Subject Population/ Demographics                                                                                                                                                                                                                                                                                                      | Sport type (number of patients)                                                                                                                                              | Mean Follow Up                                              |
|-----------------------------|---------------------------------------------------------------------------------------------------------------------------------------|---------------------------------------------------------------------------------------------------------------------------------------------------------------------------------------------------------------------------------------------------------------------------------------------------------------------------------------|------------------------------------------------------------------------------------------------------------------------------------------------------------------------------|-------------------------------------------------------------|
| Anakwenze et al. (2010)(28) | Publically available data from:<br>Press releases<br>NBA game summaries<br>Player profiles<br>Weekly injury reports between 1997-2007 | <p><b>Surgical group</b><br/>Age = 27.8 y<br/>Ht: 207.16 cm<br/>Wt: 107.15 kg<br/>BMI: 24.9</p> <p><b>Control group</b><br/>Age: 28.5 y<br/>Ht: 204.27 cm<br/>Wt: 106.50 kg<br/>BMI: 25.4</p>                                                                                                                                         | 24 NBA players with pathology;<br>48 controls NBA players                                                                                                                    | 1 y                                                         |
| Earhart et al. (2012)(24)   | Press releases<br>Newspaper articles<br>Team injury reports between 1980-2009                                                         | <p><b>Surgical group</b><br/><u>Pitchers</u><br/>Age: 32.9 y<br/>BMI = 25.6<br/>Exp= 9 y</p> <p><u>Hitters</u><br/>Age = 31.8 y<br/>BMI = 26.5<br/>Exp= 9 y</p> <p><b>Conservative group</b><br/><u>Pitchers</u><br/>Age: 28.1 y<br/>BMI = 24.9<br/>Exp= 4 y</p> <p><u>Hitters</u><br/>Age = 29.3 y<br/>BMI = 26.9<br/>Exp= 6.2 y</p> | 69 MLB athletes<br><br>40 surgical:<br>(20 pitchers and 20 hitters further stratified to 13 infielders 7 outfielders)<br><br>29 conservative:<br>(9 pitchers and 20 hitters) | Post treatment performance statistics averaged at 1 and 3 y |
| Hsu et al.                  | Newspaper archives, team injury reports, player                                                                                       | <b>Surgical group</b>                                                                                                                                                                                                                                                                                                                 | 137 NFL players:                                                                                                                                                             | Minimum 2 y follow up                                       |

|                             |                                                                                                                 |                                                                                                                                                                                                                        |                                                                                                                                                                          |                       |
|-----------------------------|-----------------------------------------------------------------------------------------------------------------|------------------------------------------------------------------------------------------------------------------------------------------------------------------------------------------------------------------------|--------------------------------------------------------------------------------------------------------------------------------------------------------------------------|-----------------------|
| (2010)(22)                  | profiles, press releases between 1979-2008                                                                      | Age: 27.5 y<br>BMI = 32<br>NFL exp: 4.4 y<br><br><b>Conservative group</b><br>Age: 29.4 y<br>BMI = 29.4<br>NFL exp: 6.4 y                                                                                              | 8 QB<br>7 RB<br>11 WR<br>9 TE<br>3 kickers<br>35 Offensive line<br>31 Defensive line<br>19 LB<br>13 Defensive second<br><br>96 surgical<br><br>34 treated conservatively |                       |
| Hsu et al. (2011)(23)       | Newspaper archives, team injury reports, player profiles, press releases team medical records between 1972-2008 | <u>NFL:</u><br>Age: 27.9 y<br>BMI: 32.1<br><u>NBA:</u><br>Age: 28.0 y<br>BMI: 24.6<br><u>NHL:</u><br>Age: 29.2<br>BMI: 26.4<br><u>MLB:</u><br>Age: 30.7<br>BMI: 26.2                                                   | 342 professional athletes<br>NFL: 138<br>NHL: 86<br>MLB: 68<br>NBA: 50<br><br>226 surgical<br><br>116 treated conservatively                                             | Minimum 2 y follow up |
| Matsunaga et al. (1993)(31) | Surgeons patient files                                                                                          | 20 men, 8 females<br><br><b>Surgical groups:</b><br><i>Simple disc excision</i><br>N = 11<br>Age = 34.5 +/- 8.5<br><br><i>Percutaneous discectomy</i><br>N = 15<br>Age = 33.4 +/- 4.9<br><br><i>Disc excision with</i> | Students and workers belonging to club teams (2 professional cyclists)                                                                                                   | Mean = 2.9 y          |

|                             |                                                                                                                                                                                        |                                                                                                        |                                                                                                                                                                                                                    |                                      |
|-----------------------------|----------------------------------------------------------------------------------------------------------------------------------------------------------------------------------------|--------------------------------------------------------------------------------------------------------|--------------------------------------------------------------------------------------------------------------------------------------------------------------------------------------------------------------------|--------------------------------------|
|                             |                                                                                                                                                                                        | <i>spinal fusion</i><br>N = 2<br>Age = 36.2 +/- 7.9                                                    |                                                                                                                                                                                                                    |                                      |
| Mochida et al. (2001)(30)   | Surgeon patient files. Elite athletes that underwent surgery for lumbar disc herniation from 1989 – 1995                                                                               | Elite athletes:<br>24 m<br>6 f<br>Age: 23.6 y<br><br>Non-athletes:<br>30 m<br>12 f<br>Age: 25.6 y      | 30 elite athletes:<br>7 professional or semi-professional; 15 collegiate; 8 HS<br>(judo, track and field, tennis swimming, baseball, rugby, Fencing, wrestling<br><br>Comparison group of 42 selected non-athletes | Range = 2-7.4 y<br>Mean = 3.5 y      |
| Sakou et al. (1993)(32)     | Athletes that underwent surgery for lumbar disc herniation and compete at national level from 1989 – 1992                                                                              | 11 m<br>2 f<br>Age range: 14 – 34, mean = 18.6 y                                                       | 13 athletes<br>2 Soccer<br>2 judo<br>2 baseball<br>1 boxing<br>1 karate<br>1 gymnastics<br>2 rugby<br>1 basketball<br>1 cyclist                                                                                    | Range = 2.3 to 3.9 y<br>Mean = 3.1 y |
| Savage et al. (2010)(35)    | NFL players diagnosed with an LDH using information from team injury reports, game summaries, player profiles, press releases, newspaper archives, team medical records from 1986-2008 | 23 m<br>Age = 28.5 y<br>BMI = 28.5                                                                     | 23 NFL offensive skill position players-<br>4 QB<br>4 RB<br>5 TE<br>10 Wide receivers                                                                                                                              | Minimum 2 y follow up                |
| Schroeder et al. (2013)(25) | Team medical records, newspaper archives, weekly injury reports, player profiles, press releases from 1967 - 2009                                                                      | <b>Surgical group</b><br>56 m<br>Age = 28.7 y<br><br><b>Conservative group</b><br>31 m<br>Age = 28.8 y | 87 NHL players                                                                                                                                                                                                     | Minimum 2 y follow up                |
| Wang et al. (1999)(14)      | Surgeon's patient files. NCAA athletes that underwent surgery for lumbar disc herniation from                                                                                          | <b>Surgical group:</b><br>14 subjects(12 m; 2                                                          | 14 NCAA division 1 varsity collegiate athletes                                                                                                                                                                     | Mean follow up = 3.1 y               |

|                               |                                                                                                                                           |                                                                                                                                                                                                |                                                                                                                                                               |                                  |
|-------------------------------|-------------------------------------------------------------------------------------------------------------------------------------------|------------------------------------------------------------------------------------------------------------------------------------------------------------------------------------------------|---------------------------------------------------------------------------------------------------------------------------------------------------------------|----------------------------------|
|                               | 1988 to 1995.                                                                                                                             | f)<br>Age range: 18-25,<br>mean = 20.7 y<br><br><b>Conservative group:</b><br>37 subjects<br>Age: NR                                                                                           | Football = 4<br>Basketball = 2<br>Swimming = 2<br>Water polo = 2<br>Soccer = 1<br>Track and field = 1<br>Volleyball = 1<br>Diving = 1                         |                                  |
| Watkins et al<br>(2003)(33)   | Surgeon's patient files. Athletes that underwent surgery for lumbar herniated nucleus pulposus from 1984 to 1998                          | 60 professional and Olympic athletes<br>Age range: 19-37,<br>mean = 26.8 y                                                                                                                     | Ballet = 1<br>Baseball = 21<br>Basketball = 7<br>Football = 20<br>Hockey = 7<br>Olympic skiing = 1<br>Olympic swimming = 1<br>Olympic water polo = 2          | Minimum 2 y follow up            |
| Watkins et al.<br>(2012)(34)  | Athletes that underwent surgery for lumbar herniated nucleus pulposus from 1996 to 2010                                                   | 85 but dropped to 75 professional athletes<br>Age = 28.1 y                                                                                                                                     | Football = 33<br>Hockey = 13<br>Baseball = 19<br>Basketball = 7<br>Other = 3                                                                                  | 1 y                              |
| Weistroffer<br>(2011)(26)     | Publically available data from:<br><br>Press releases<br>NBA game summaries<br>Player profiles<br>Weekly injury reports between 1982-2009 | 66 professional athletes<br><u>Offensive linemen</u><br>n = 36<br>Age = 26.8 +/- 3.8 y<br>BMI = 36.1 +/- 2.4<br><u>Defensive linemen</u><br>n = 30<br>Age = 28.6 +/- 3.6<br>BMI = 34.4 +/- 2.7 | 66 NFL linemen (36 offensive, 30 defensive)<br><br>Surgical group = 52 (31 offensive, 21 defensive)<br><br>Conservative group = 14 (5 offensive, 9 defensive) | NR                               |
| Yoshimoto et al<br>(2013)(29) | Surgeon's patient files. Athletes that underwent surgery for lumbar disc herniation nucleus from 2005 to 2011                             | 25 athletes (20 m, 5 f)<br>Age = 19.4 +/- 7.0 y<br>Ht = 173.5 +/- 6.8 cm<br>Wt = 66.0 +/- 11.3 kg<br>BMI = 21.9 +/- 2.9                                                                        | Baseball = 5<br>Basketball = 4<br>Badminton = 3<br>Soccer = 2<br>Volleyball = 2<br>Rugby = 2<br>Others = 7                                                    | Range = 12-64 m<br>Mean = 22.8 m |

M = males, N = number, f = females, BMI = body mass index, y = year(s), ht = height, wt = weight, exp = experience, kg = kilograms, m = meters, cm = centimeters, vs = versus, NFL = National Football League, NHL = National Hockey League, NBA = National Basketball Association, MLB = Major League Baseball, HS= high school, NCAA = National Collegiate Athletic Association, ADL = activities of daily living, RTS = return to sport, NR = not reported, , ERA= earned run average, IP= innings pitched, K= strikeouts, WHIP= Walks plus hits divided by innings pitched, RBI = runs batted in, QB = quarterback, RB = running back, WR = wide receiver, TE = tight end, LB = linebacker
