# Supplementary material for: Return to sport after open and microdiscectomy surgery versus conservative treatment for lumbar disc herniation: a systematic review with meta-analysis
Source: HighWire-hosted journal article supplement (doi:10.1136/bjsports-2015-094691), 2015-10-21
Supplement: bjsports-2015-094691supp_table2.pdf [file bjsports-2015-094691supp_table2.pdf]

Supplementary Table 2. Sports Performance and Health Related Detailed Reported Outcomes of Included Studies

| Study                                                                    | Outcome Measure(s)                                                                                                                                                      | Detailed Results                                                                                                                                                                                                                                                                                                                                                                                                                                                                                                                                                                                                                    |
|--------------------------------------------------------------------------|-------------------------------------------------------------------------------------------------------------------------------------------------------------------------|-------------------------------------------------------------------------------------------------------------------------------------------------------------------------------------------------------------------------------------------------------------------------------------------------------------------------------------------------------------------------------------------------------------------------------------------------------------------------------------------------------------------------------------------------------------------------------------------------------------------------------------|
| <b><i>SURGICAL TREATMENT ONLY (ATHLETES VS MATCHED NON-ATHLETES)</i></b> |                                                                                                                                                                         |                                                                                                                                                                                                                                                                                                                                                                                                                                                                                                                                                                                                                                     |
| Mochida et al. (2001)(30)                                                | <p>Scoring system of JOA for LBP = 9 points for subjective and 6 points for clinical signs (&gt; 12/15 = success);</p> <p>ADL scoring system of JOA (4-point scale)</p> | <p>Athletes who returned earlier than 3 m were more likely to have LBP than athletes who returned after more than 3 m (P = .024)</p> <p><b>Final surgical failure rate:</b><br/>           Athlete-MIN (35%) v athlete -EXT(60%): P = ns<br/>           Non-athlete-MIN v non-athlete-EXT: P = .049<br/>           Non-athlete-MIN v athlete-EXT: P = .014</p> <p><b>Improvement in low back pain by ADL score:</b><br/>           Non-athlete-MIN v athlete-MIN: P = .013<br/>           Non-athlete-MIN v athlete-EXT: P = .012</p> <p><b>Return to preoperative sport:</b><br/>           Athlete-MIN v athlete-EXT: P = .03</p> |
| <b><i>SURGICAL TREATMENT ONLY (ATHLETES vs MANUAL LABORERS)</i></b>      |                                                                                                                                                                         |                                                                                                                                                                                                                                                                                                                                                                                                                                                                                                                                                                                                                                     |
| Matsunaga et al. (1993)(31)                                              | Rate of RTS, time until RTS                                                                                                                                             | See table 3; detailed results NR                                                                                                                                                                                                                                                                                                                                                                                                                                                                                                                                                                                                    |
| <b><i>SURGICAL TREATMENT ONLY (ATHLETES ONLY)</i></b>                    |                                                                                                                                                                         |                                                                                                                                                                                                                                                                                                                                                                                                                                                                                                                                                                                                                                     |
| Sakou et al. (1993)(32)                                                  | Rate of RTS, Macnab's grading of disc protrusion based on MRI                                                                                                           | Of the 9 athletes that returned to sport, 5 recovered to pre-operative level; other four showed lower level of recovery                                                                                                                                                                                                                                                                                                                                                                                                                                                                                                             |
| Savage et al. (2010)(35)                                                 | <p>Power rating</p> <p>Power rating divided by the number of games played.</p> <p>Ratio of number of games started v number of games played</p>                         | <p><b>QB:</b><br/>           PR per game before surgery = 11.8<br/>           PR per game after surgery = 11.9<br/>           P = .95</p>                                                                                                                                                                                                                                                                                                                                                                                                                                                                                           |

|                                 |                                                                 |                                                                                                                                                                                                                                                                                                                                                                                                                                          |
|---------------------------------|-----------------------------------------------------------------|------------------------------------------------------------------------------------------------------------------------------------------------------------------------------------------------------------------------------------------------------------------------------------------------------------------------------------------------------------------------------------------------------------------------------------------|
|                                 |                                                                 | <p><b>RB, TE, WR:</b><br/> PR per game before surgery = 4.1<br/> PR per game after surgery = 3.7<br/> P = .67</p> <p>53% (n = 9 of 17) of players treated surgically with discectomy had higher PRs after surgery</p> <p>No change in percent games started before vs. after treatment (p = .99)</p> <p>No significant difference comparing demographic findings between athletes who RTS in the NFL and those who did not (P = .52)</p> |
| <p>Watkins et al (2003)(33)</p> | <p>Return to competitive play, neurologic deficits by level</p> | <p>No significant difference in RTS based on leg v back pain</p> <p>88.2% (15/17) athletes with neurologic deficits regained full function</p> <p>Neurologic deficits by level</p> <p>Pre-surgical:<br/> L3 = 1<br/> L4 = 3<br/> L5 = 4<br/> S1 = 8<br/> L5 and S1 = 1</p> <p>Post-surgical:<br/> L3 = 0<br/> L4 = 0<br/> L5 = 0<br/> S1 = 2<br/> L5 and S1 = 0</p>                                                                      |

|                                                                  |                                                                                                                                                                                             |                                                                                                                                                                                                                                                                                                                                                                                                                    |
|------------------------------------------------------------------|---------------------------------------------------------------------------------------------------------------------------------------------------------------------------------------------|--------------------------------------------------------------------------------------------------------------------------------------------------------------------------------------------------------------------------------------------------------------------------------------------------------------------------------------------------------------------------------------------------------------------|
| Watkins et al. (2012)(34)                                        | Participation in at least one minute of a professional regular season game                                                                                                                  | <p>This study did not assess performance outcomes, only measuring return to play rate</p> <p>No significant difference in RTS rate between sports (P = .48)</p> <p>No significant difference in return time between sports (P = .44)</p> <p>No significant difference in percentage of athletes who returned to sport after surgery (P = .62) or time to return average (P = .62) between disc levels operated</p> |
| Yoshimoto et al (2013)(29)                                       | JOA score, SF-36                                                                                                                                                                            | <p>26.3%(5/19) suffered a slight decline in performance due to continued low back pain or leg pain</p> <p>JOA: improvement (80.4%)(p&lt; .05)</p> <p>SF-36: improvement in all subscales (p&lt; .05)</p>                                                                                                                                                                                                           |
| <b><i>SURGICAL VS CONSERVATIVE TREATMENT (ATHLETES ONLY)</i></b> |                                                                                                                                                                                             |                                                                                                                                                                                                                                                                                                                                                                                                                    |
| Earhart et al. (2012)(24)                                        | <p>Pitchers:</p> <p>Total wins</p> <p>ERA</p> <p>Saves</p> <p>Innings pitched</p> <p>Strikeouts</p> <p>WHIP</p> <p>Hitters:</p> <p>Runs</p> <p>Home runs</p> <p>RBI</p> <p>Stolen bases</p> | <p><b>Surgical group (pitchers):</b></p> <p><b>3 y pre</b></p> <p>Total wins = 9.2</p> <p>ERA = 3.52</p> <p>Saves = 7.4</p> <p>Innings pitched = 136.3</p> <p>Strikeouts = 110.9</p> <p>WHIP = 1.22</p> <p><b>1 y post</b></p> <p>Total wins = 7.7 (P = .44)</p> <p>ERA = 4.16 (P = .05)</p> <p>Saves = 4.4 (P = .39)</p>                                                                                          |

Batting average

Innings pitched = 114.0 (P = .37)  
Strikeouts = 86.4 (P = .32)  
WHIP = 1.35 (P = .04)

3 y post

Total wins = 7.9 (P = .49)  
ERA = 4.13 (P = .04)  
Saves = 2.8 (P = .22)

Innings pitched = 118.0 (P = .43)  
Strikeouts = 85.8 (P = .34)  
WHIP = 1.35 (P = .03)

**Conservative group (pitchers):**

**3 y pre**

Total wins = 10.0  
ERA = 4.16  
Saves = 0.5

Innings pitched = 158.1  
Strikeouts = 108.1  
WHIP = 1.43

1 y post

Total wins = 5.8 (P = .13)  
ERA = 4.25 (P = .82)  
Saves = 0 (P = .30)

Innings pitched = 126.4 (P = .54)  
Strikeouts = 80.8 (P = .42)  
WHIP = 1.48 (P = .69)

3 y post

Total wins = 6.3 (P = .55)  
ERA = 6.16 (P = .50)  
Saves = 0.3 (P = .77)

Innings pitched = 125.7 (P = .77)

Strikeouts = 88.0 (P = .78)

WHIP = 1.50 (P = .69)

**Surgical group (All hitters):**

3 y pre

Runs = 68.2

HR = 14.3

RBI = 58.7

SB = 6.6

BA = 0.269

1 y post

Runs = 35.0 (P = .008)

HR = 16.5 (P = .80)

RBI = 35.4 (P = .009)

SB = 1.9 (P = .066)

BA = 0.268 (P = .97)

3 y post

Runs = 59.2 (P = .60)

HR = 12.4 (P = .67)

RBI = 49.0 (P = .40)

SB = 6.8 (P = .95)

BA = 0.274 (P = .56)

**Conservative group (All hitters):**

3 y pre

Runs = 56.4

HR = 16.6

RBI = 56.6

SB = 4.6

BA = 0.280

|                       |                                                                                                                                                        |                                                                                                                                                                                                                                                                                                                                                                                              |
|-----------------------|--------------------------------------------------------------------------------------------------------------------------------------------------------|----------------------------------------------------------------------------------------------------------------------------------------------------------------------------------------------------------------------------------------------------------------------------------------------------------------------------------------------------------------------------------------------|
|                       |                                                                                                                                                        | <p>1 y post<br/> Runs = 41.3 (P = .25)<br/> HR = 17.1 (P = .91)<br/> RBI = 48.6 (P = .56)<br/> SB = 1.9 (P = .22)<br/> BA = 0.283 (P = .84)</p> <p>3 y post<br/> Runs = 70.4 (P = .48)<br/> HR = 20.2 (P = .54)<br/> RBI = 70.6 (P = .41)<br/> SB = 3.6 (P = .68)<br/> BA = 0.283 (P = .85)</p>                                                                                              |
| Hsu et al. (2010)(22) | <p>Standardized player performance score based on game stats and dependent on position</p> <p>Ratio of number of games started versus games played</p> | No difference in groups with regards to performance score and games started (P = .77)                                                                                                                                                                                                                                                                                                        |
| Hsu et al. (2011)(23) | RTS rate; career games and years played after surgery (normalized for sport -type)                                                                     | <p>RTS rate= this rate is based on games per season.<br/> MLB = 1 (p &lt; .05)<br/> NHL = .9<br/> NBA = .85<br/> NFL = .7 (p &lt; .05)</p> <p>MLB players RTS at a higher rate than other sports (p &lt; 0.05).</p> <p>NFL players RTS at a lower rate than other sports (p &lt; 0.05)</p> <p>No significant differences were demonstrated in either cohort for the NHL and NBA athletes</p> |

|                                    |                                                                                                                                                                                    |                                                                                                                                                                                                                                                                                                                                                                                                                                                                                                                                                                                                                                                                                                         |
|------------------------------------|------------------------------------------------------------------------------------------------------------------------------------------------------------------------------------|---------------------------------------------------------------------------------------------------------------------------------------------------------------------------------------------------------------------------------------------------------------------------------------------------------------------------------------------------------------------------------------------------------------------------------------------------------------------------------------------------------------------------------------------------------------------------------------------------------------------------------------------------------------------------------------------------------|
| <p>Schroeder et al. (2013)(25)</p> | <p>Games played per year, total number of points per game, and a performance score modified for hockey that was based on previously published scoring systems for other sports</p> | <p>No difference between groups for RTS rates, decrease in games per season, or decrease in performance score after treatment</p> <p>RTS % NR</p> <p><b>Surgical:</b><br/>Decreased from 55 games/season to 36 games/season (P&lt;0.0001)</p> <p><b>Conservative:</b><br/>Decreased from 55 games/season to 44 games/season (P=0.01)</p> <p><b>Surgical group:</b><br/>Significant decrease in games played per season (P &lt; .01), points per game (P &lt; .0001), and performance score (P &lt; .02) before and after surgery.</p> <p><b>Conservative group:</b><br/>Significant decrease in games played per season (P &lt; .0001) and performance score (P &lt; .004) before and after surgery</p> |
| <p>Weistroffer (2011)(26)</p>      | <p>RTS on active NFL roster for a regular season NFL game</p>                                                                                                                      | <p><b>Surgical group:</b><br/>63.5% became NFL starters. 3 players who were initially starters lost that status postoperatively.</p> <p><b>Conservative group:</b> 28.6% successfully RTS which was less (P &lt; .05) than the surgical group</p> <p>7 (13.5%) linemen (6 offense, 1 defense) in surgical</p>                                                                                                                                                                                                                                                                                                                                                                                           |

|                                                                                                        |                                                                                                                                                                                                                                                                                                                                                                          |                                                                                                                                                                                                                                                                                                                                                                                                                                                                                                                                                                                                                                                                                                                                                                                                                                                                                                                                                                                                                                                                                |
|--------------------------------------------------------------------------------------------------------|--------------------------------------------------------------------------------------------------------------------------------------------------------------------------------------------------------------------------------------------------------------------------------------------------------------------------------------------------------------------------|--------------------------------------------------------------------------------------------------------------------------------------------------------------------------------------------------------------------------------------------------------------------------------------------------------------------------------------------------------------------------------------------------------------------------------------------------------------------------------------------------------------------------------------------------------------------------------------------------------------------------------------------------------------------------------------------------------------------------------------------------------------------------------------------------------------------------------------------------------------------------------------------------------------------------------------------------------------------------------------------------------------------------------------------------------------------------------|
|                                                                                                        |                                                                                                                                                                                                                                                                                                                                                                          | <p>cohort sustained recurrent LDH</p> <p>Multivariate logistic regression analysis demonstrated no association between groups related to age, height, weight, BMI, position played, NFL experience, Pro Bowl appearances</p>                                                                                                                                                                                                                                                                                                                                                                                                                                                                                                                                                                                                                                                                                                                                                                                                                                                   |
| <b><i>SURGICAL TREATMENT VS CONTROL GROUP (MATCHED ASYMPTOMATIC ATHLETES WITHOUT INTERVENTION)</i></b> |                                                                                                                                                                                                                                                                                                                                                                          |                                                                                                                                                                                                                                                                                                                                                                                                                                                                                                                                                                                                                                                                                                                                                                                                                                                                                                                                                                                                                                                                                |
| Anakwenze et al. (2010)(28)                                                                            | <p>Preindex to postindex season performance (index season = season of surgery)</p> <p>Performance measures:<br/> Number of games played<br/> Number of minutes/game<br/> Points per 40 minutes<br/> Rebounds per 40 minutes<br/> Assists per 40 minutes<br/> Steals per 40 minutes<br/> Blocks per 40 minutes<br/> Shooting percentage</p> <p>Number of games played</p> | <p><b>Surgical group (postindex-preindex)</b><br/> Number of games played = -20.1 (P = .093)<br/> Number of minutes/game = - 4.44 (P = .414)<br/> Points per 40 minutes = -1.80 (P = .598)<br/> Rebounds per 40 minutes = -0.25 (P = &lt; .049)<br/> Assists per 40 minutes = -0.12 (P = .172)<br/> Steals per 40 minutes = -0.08 (P = .501)<br/> Blocks per 40 minutes = 0.18 (P = &lt; .008)<br/> Shooting percentage = -0.065 (P = .831)</p> <p><b>Control group (postindex-preindex)</b><br/> Number of games played = -8.81 (P = .093)<br/> Number of minutes/game = - 2.24 (P = .414)<br/> Points per 40 minutes = -2.46 (P = .598)<br/> Rebounds per 40 minutes = -1.42 (P = &lt; 0.049)<br/> Assists per 40 minutes = -0.28 (P = .172)<br/> Steals per 40 minutes = -0.17 (P = .501)<br/> Blocks per 40 minutes = 0.33 (P = &lt; .008)<br/> Shooting percentage = -0.058 (P = .831)</p> <p>Surgical group played an average of 20.1 fewer games (pre to post surgically) compared to control group playing an average of 8.8 fewer games after surgery (P = .093).</p> |
| Wang et al. (1999)(14)                                                                                 | SF-36                                                                                                                                                                                                                                                                                                                                                                    | <p>SF-36 significant results:</p> <p>Physical function</p>                                                                                                                                                                                                                                                                                                                                                                                                                                                                                                                                                                                                                                                                                                                                                                                                                                                                                                                                                                                                                     |



|  |  |                                                                                                                                                                                                                                                                                                                                                                          |
|--|--|--------------------------------------------------------------------------------------------------------------------------------------------------------------------------------------------------------------------------------------------------------------------------------------------------------------------------------------------------------------------------|
|  |  | <p>Return to sport = 98<br/> Did not return = 84<br/> P = .009</p> <p>Bodily pain<br/> Return to sport = 81<br/> Did not return = 43<br/> P = .003</p> <p>Physical summary<br/> Return to sport = 50<br/> Did not return = 39<br/> P = .009</p> <p>Scores not significantly different for surgical patients (n=11) and uninjured age-matched control athletes (n=37)</p> |
|--|--|--------------------------------------------------------------------------------------------------------------------------------------------------------------------------------------------------------------------------------------------------------------------------------------------------------------------------------------------------------------------------|

Japanese Orthopedic Association (JOA), LBP = low back pain, ADL = activities of daily living, MIN = minimal amount of disc removed (1.0 gram on average), EXT = extensive amount of disc removed (3.4 grams on average), m = months, RTS = return to sport. PN = percutaneous nucleoplasty, f/u = follow-up, wks = weeks, m= months, y= years, NR= not reported, ERA= earned run average, IP= innings pitched, K= strikeouts, WHIP= Walks plus hits divided by innings pitched, RBI = runs batted in, PR = power rating, QB = quarterback, RB = running backs, TE = tight ends, WR = wide receivers, MRI = Magnetic Resonance Imaging, SF-36 = short form 36, v = versus, NR= not reported, ERA= earned run average, RBI = runs batted in, NFL = National Football League, NHL = National Hockey League, NBA = National Basketball Association, MLB = Major League Baseball, RTS = return to sport, BMI = body mass index, LDH = lumbar disc herniation
